# Supplementary material for: Influenza causes alterations to oligodendrocyte-specific transcripts and the myelin lipidome in the adult mouse central nervous system.
Source: Research Square preprint supplement (doi:10.21203/rs.3.rs-310861/v1), 2021-03-22
Supplement: Supplementary file 1 [file d1efa99bce53638456aee760.xlsx]

## Sheet: Dataset S1
	Flu							Saline					Cuprizone
	F1	F2	F4	F3.4	F4.1	F4.3	F9.2	S1	S4	S1.2	S1.3	S1.4	CPZ 6.1	CPZ 6.2	CPZ 6.3	CPZ 7.2
Total Filament Area	2127589	1854798	1741097	2470247	3987617	3034471	1792107	2796287	2073643	3239221	2376662	2951153	1.47737e+06	2.30284e+06	2.10744e+06	2.24125e+06
Total Filament Length	544553	420372	420483	505324	974938	674585	393548	586654	501504	667363	513643	685250	440720	654118	565244	489600
Mean Filament Volume	10.2703	13.9151	14.0822	18.3863	13.82	15.5693	14.4659	17.4848	11.9183	18.972	15.6275	14.3849	8.82326	8.79293	11.0312	17.2201
Total Filament Volume	710572	703522	658357	1060706	1484336	1222857	723381	1304577	746573	1425408	966203	1149023	406029	676291	691580	916973
Total No. Filament Branch Pts	33029	23994	22242	27300	50850	36974	23433	35212	29972	35326	29483	38184	21728	36627	29822	25351
Total No. Filament Branches	544418	420009	420418	504905	974275	673848	393229	586546	501555	666753	513334	685185	440462	654004	565206	489292
Total No. Segments	69187	50558	46751	57690	107405	78543	50006	74612	62641	75132	61827	79877	46018	76913	62693	53250
Total No. Filament Terminal Pts	36158	26564	24509	30390	56555	41569	26573	39400	32669	39806	32344	41693	24290	40286	32871	27899
Total Number of Points	69224	50664	46788	57880	107554	78742	50173	74646	62656	75361	61900	79925	46145	76955	62737	53395
Mean Filament Area	30.7513	36.6865	37.2419	42.8193	37.1269	38.6345	35.8378	37.4777	33.1036	43.1137	38.4405	36.9462	32.1041	29.9408	33.6152	42.0892
Mean Filament Length	7.87075	8.31464	8.9941	8.75929	9.07721	8.58873	7.87002	7.86273	8.00601	8.88254	8.30775	8.57882	9.57712	8.50465	9.01606	9.19436
Mean Filament Diameter	1.33792	1.49699	1.44787	1.66144	1.40819	1.56907	1.56599	1.68321	1.41087	1.67482	1.58419	1.51199	1.11503	1.2108	1.29917	1.55772
Mean Filament Straightness	0.911392	0.908261	0.899987	0.910355	0.897976	0.909558	0.897339	0.909065	0.909359	0.903351	0.916005	0.907284	0.895777	0.90713	0.902639	0.902948
Mean Point Distance from Origin	1035.61	914.835	816.717	851.695	807.484	960.73	869.374	955.168	894.609	925.959	652.796	698.867	771.778	513.487	820.287	674.145
Mean No. of Filament Branch Pts	892.676	226.358	601.135	143.684	341.275	185.799	140.317	1035.65	1998.13	154.262	403.877	795.5	171.087	872.071	677.773	132.178
Mean No. of Filament Branches	66.9229	30.504	43.9446	27.338	56.3002	30.2418	26.5839	73.0534	103.413	25.7195	43.5915	65.9783	27.4277	66.9674	47.4445	19.5444
Mean No. of Filament Segments	1869.92	476.962	1263.54	303.632	720.839	394.688	299.437	2194.47	4176.07	328.087	846.945	1664.1	362.346	1831.26	1424.84	276.941
Mean No. of Filament Terminal Pts	977.243	250.604	662.405	159.947	379.564	208.889	159.12	1158.82	2177.93	173.825	443.068	868.604	191.26	959.191	747.068	144.763
